# Supplementary material for: Label-free colorimetric detection of serum cysteine using Ag-NP probes in the presence of Be2+ ions
Source: Royal Society of Chemistry journal article supplement (doi:10.1039/d0nj00967a), 2020-01-01
Supplement: d0nj00967a1.pdf [file d0nj00967a1.pdf]

Supporting information

**Label-free colorimetric detection of serum cysteine using Ag-NPs probes for immanence of Be<sup>2+</sup> ions**

Chandrababu Rejeeth,<sup>\*a</sup> Alok Sharma,<sup>b</sup> Nipun Babu Varukattu,<sup>c</sup> Rahul Gautam<sup>d</sup>

<sup>a</sup>School of Biomedical Engineering, Med-X Research Institute, Shanghai Jiao Tong University, Shanghai 200030, P. R. China.

<sup>b</sup>State Key Laboratory of Oncogenes and Related Genes, Institute for Personalized Medicine, School of Biomedical Engineering, Shanghai Jiao Tong University, Shanghai 200030 China..

<sup>c</sup>Cancer Research Center, Shantou University Medical College, Shantou, Guangdong, China.

<sup>d</sup>Jian Pei Medical Imaging Research Center, Hangzhou 311140, P. R. China

*E-mail:* [crejee@gmail.com](mailto:crejee@gmail.com) & [crejee@sjtu.edu.cn](mailto:crejee@sjtu.edu.cn)

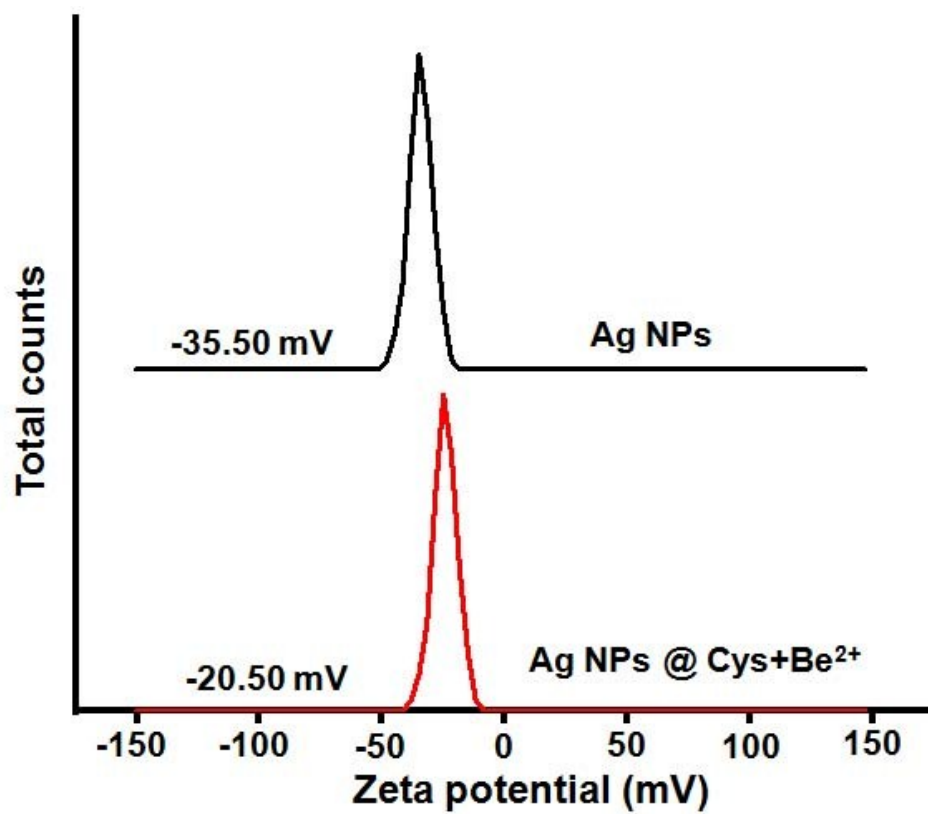

Fig S1. Zeta potential of the probe with and without analyte

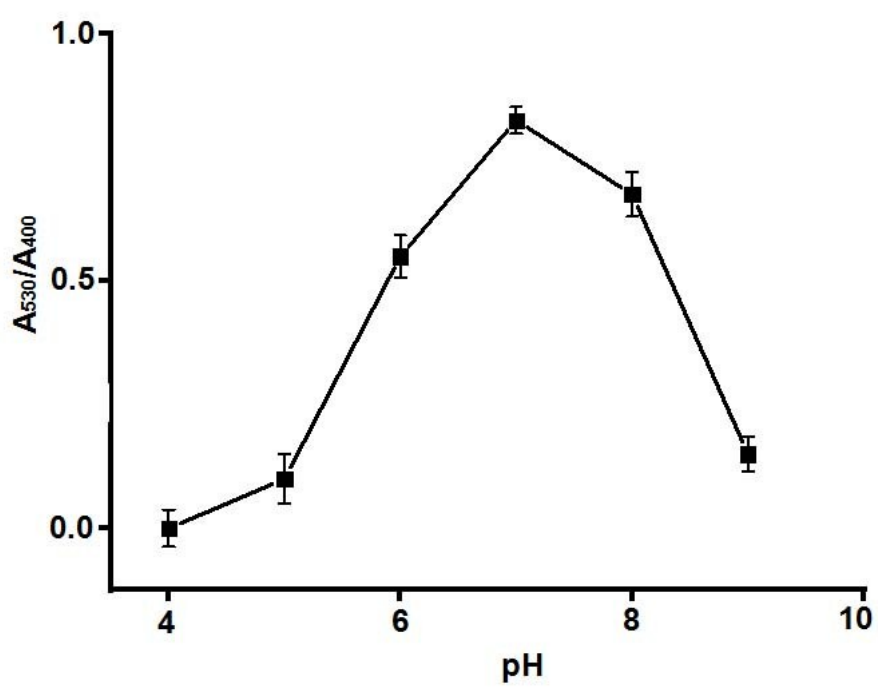

Fig S2. Effect of pH for the detection of cysteine
